# Supplementary material for: Establishment of a Murine Pro-acinar Cell Line to Characterize Roles for FGF2 and α3β1 Integrins in Regulating Pro-acinar Characteristics
Source: PubMed Central journal article supplement (PMC6662831; doi:10.1038/s41598-019-47387-y), 2019-07-29
Supplement: 41598_2019_47387_MOESM1_ESM.pdf [file 41598_2019_47387_MOESM1_ESM.pdf]

Supplementary Information

**Establishment of a Murine Salivary Pro-Acinar Cell Line to Characterize Roles  
for FGF2 and  $\alpha 3\beta 1$  Integrin in Regulating Pro-Acinar Characteristics**

Renée F. Thiemann<sup>1</sup>, Deirdre A. Nelson<sup>2</sup>, C. Michael DiPersio<sup>3</sup>,  
Melinda Larsen<sup>2</sup> and Susan E. LaFlamme<sup>1\*</sup>

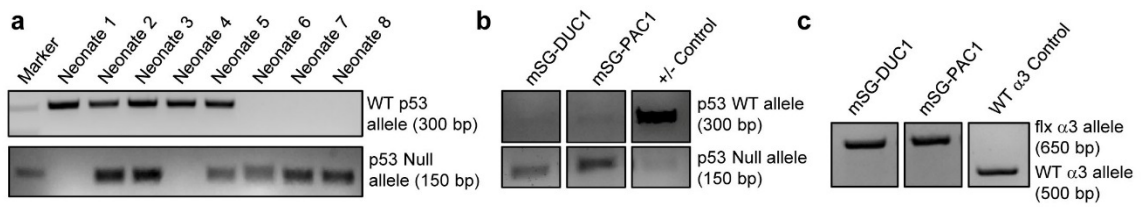

**Figure S1. Ductal & pro-acinar cell lines are homozygous for the floxed (flx) integrin  $\alpha$ 3 subunit allele and p53 null allele. (A)** PCR analysis of genomic DNA from P2 neonates used for SMG isolation and dissection. **(B)** PCR analysis of genomic DNA from the ductal and pro-acinar cell lines for **(B)** the p53 null allele, and **(C)** the integrin  $\alpha$ 3 floxed allele.

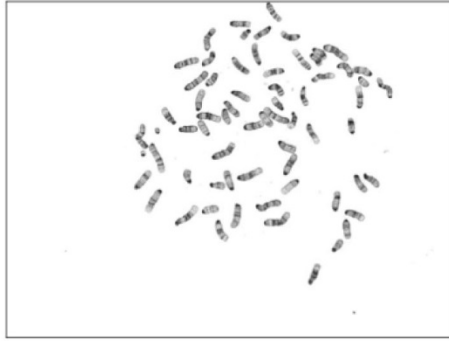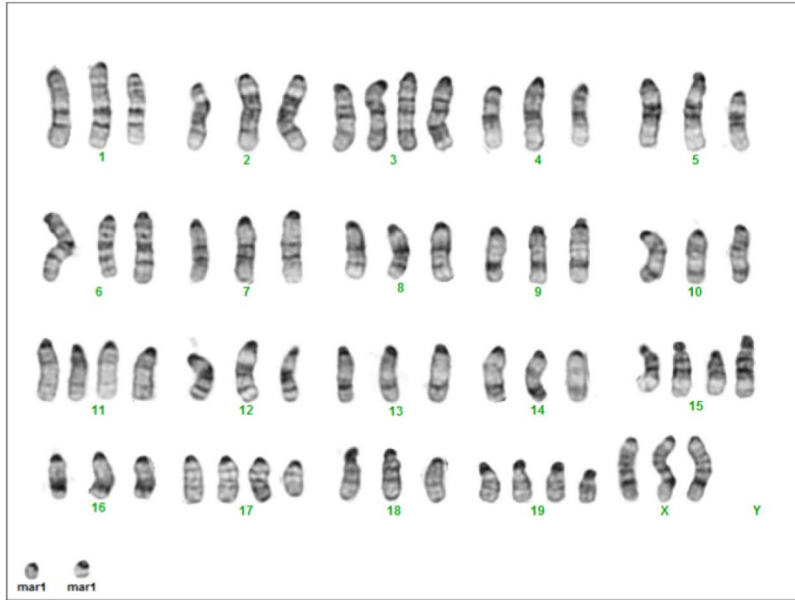

Figure S2. G-banded karyotype of mSG-PAC1 cell line.

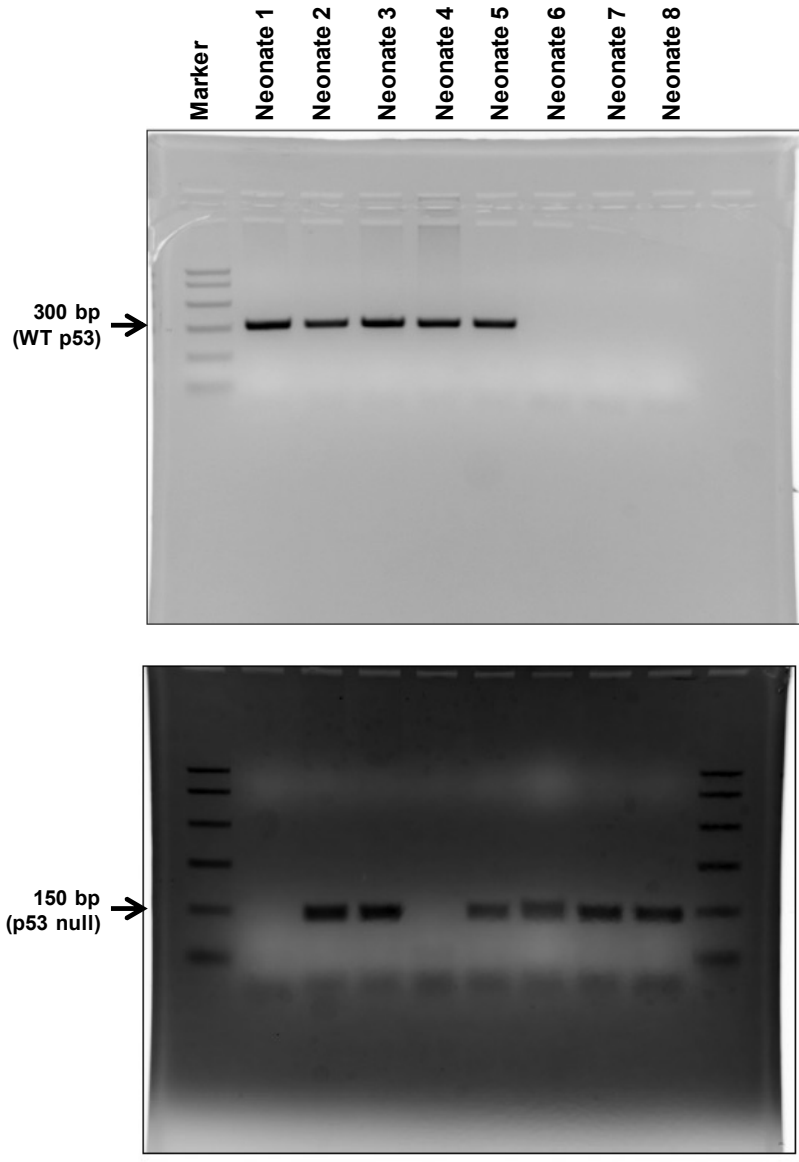

Figure S3. Images of full-length gels for Fig. S1A.

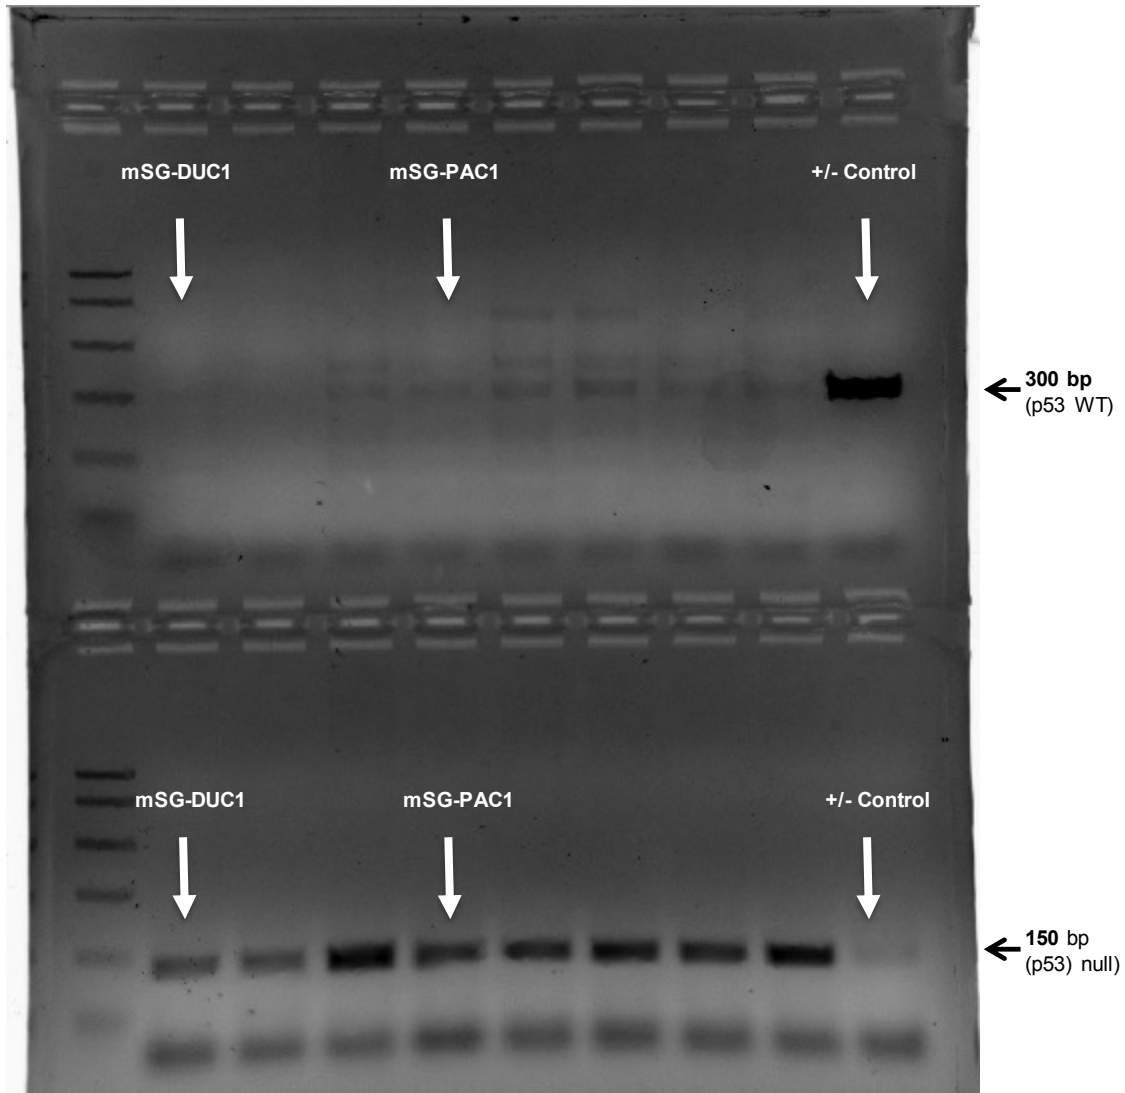

**Figure S4. Images of full-length gels for Fig. S1B.** The lanes representing cell lines used in this study are indicated by arrows and labeled.

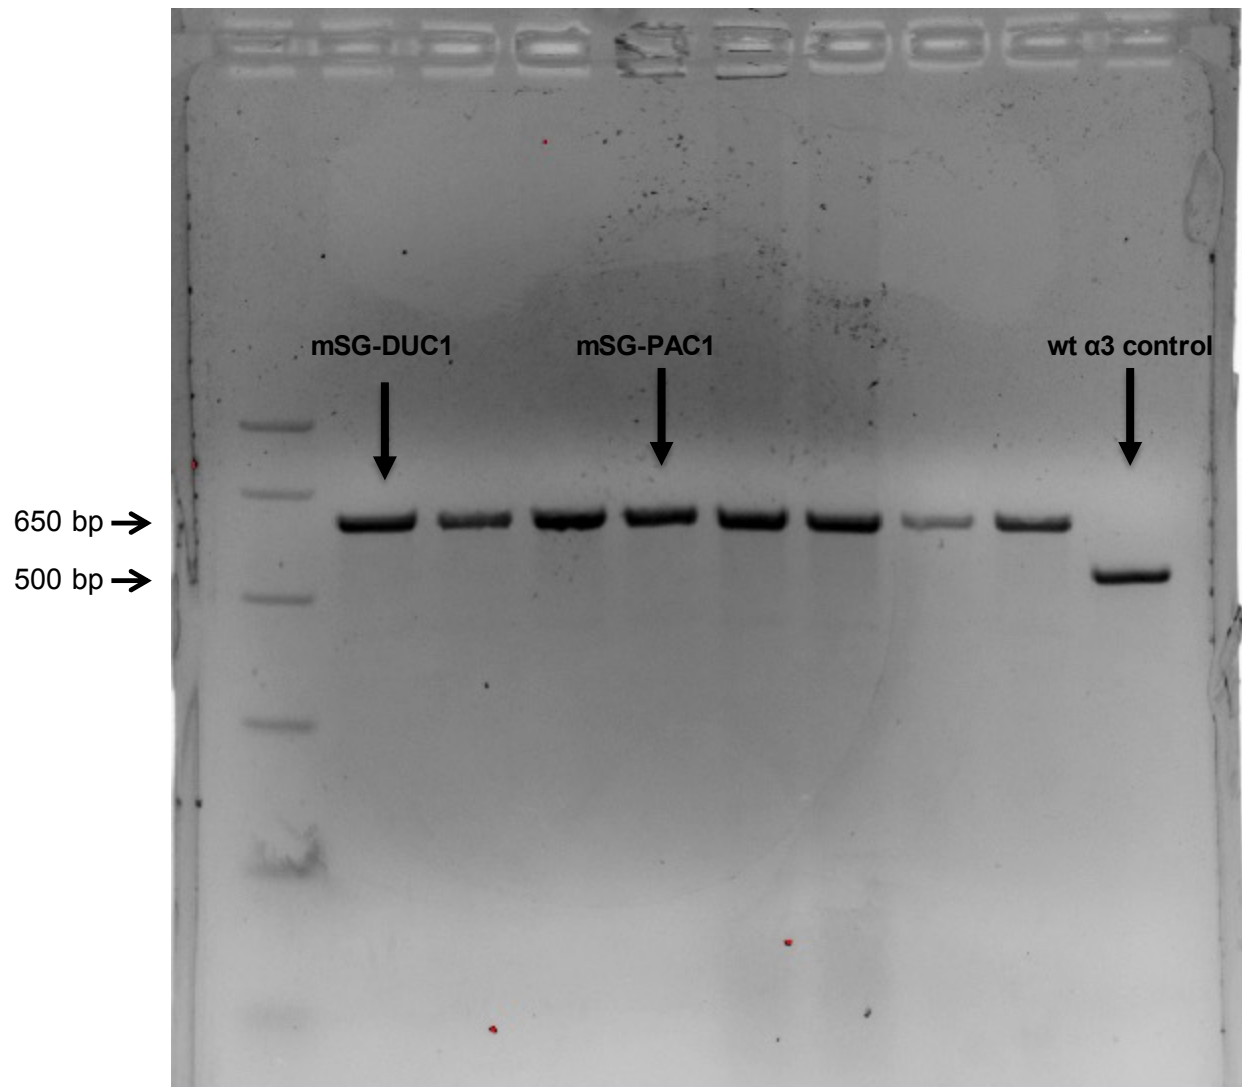

**Figure S5. Images of full-length gels for Fig. S1C.** The lanes representing cell lines used in this study are indicated by arrows and labeled.

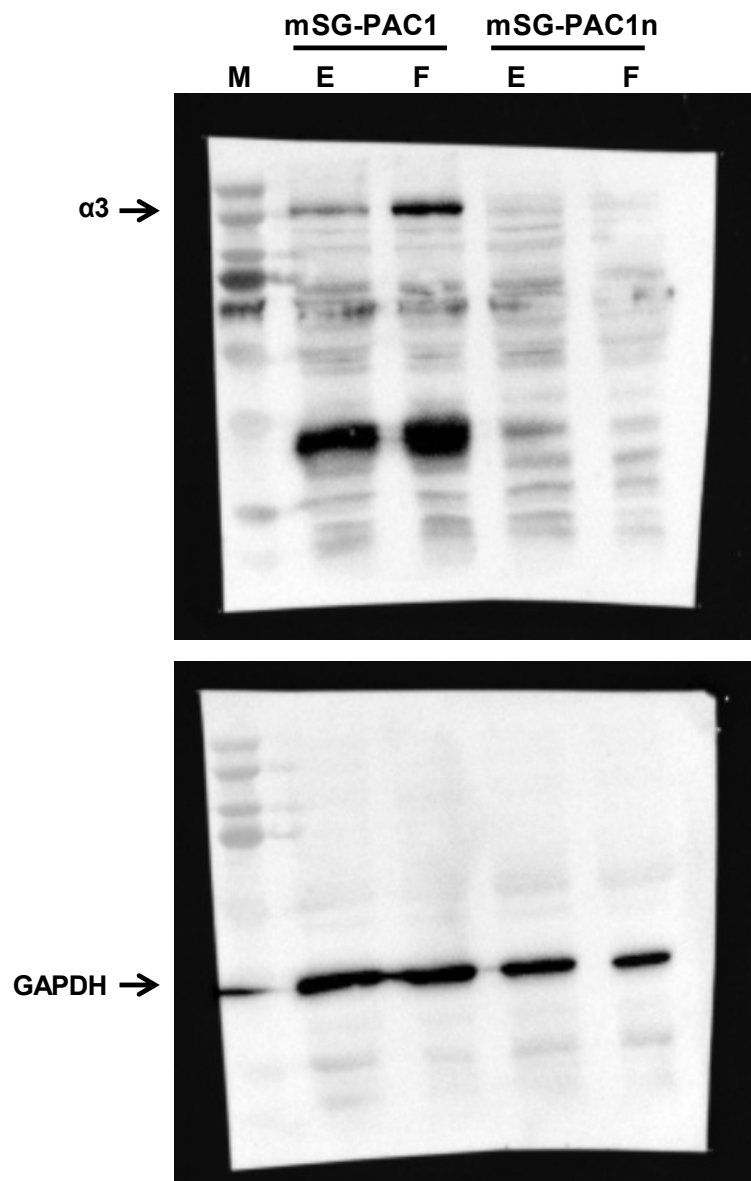

Figure S6. Images of full-length blots for Fig. 5C.

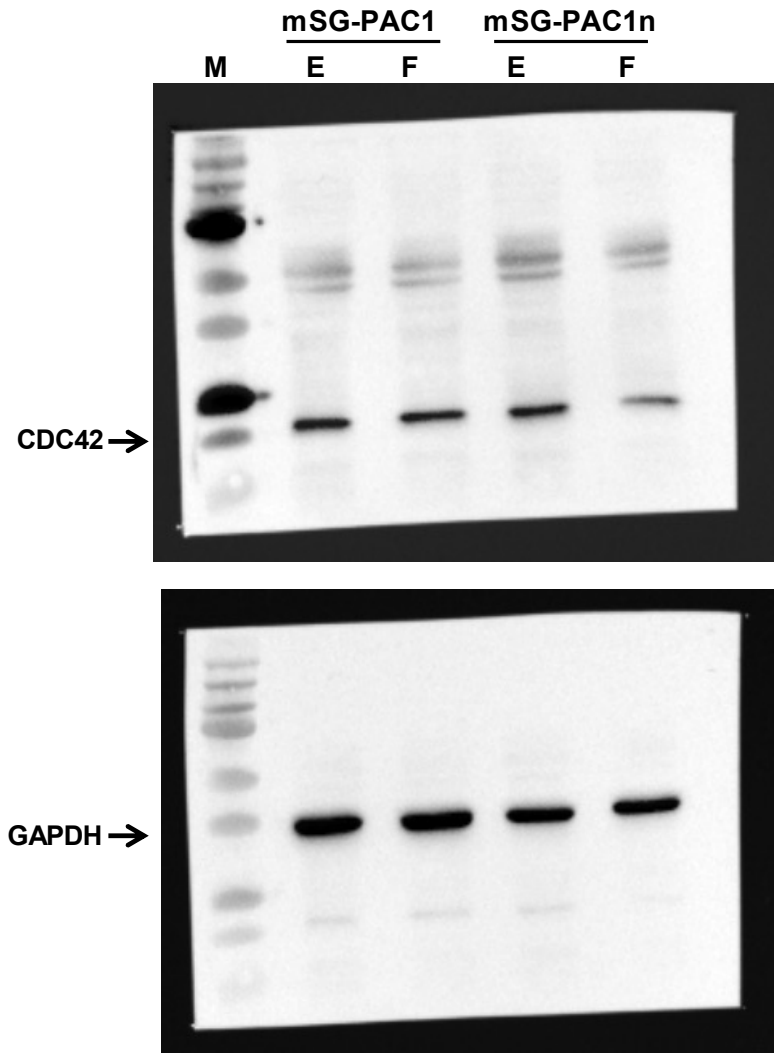

Figure S7. Images of full-length blots for Fig. 6C.



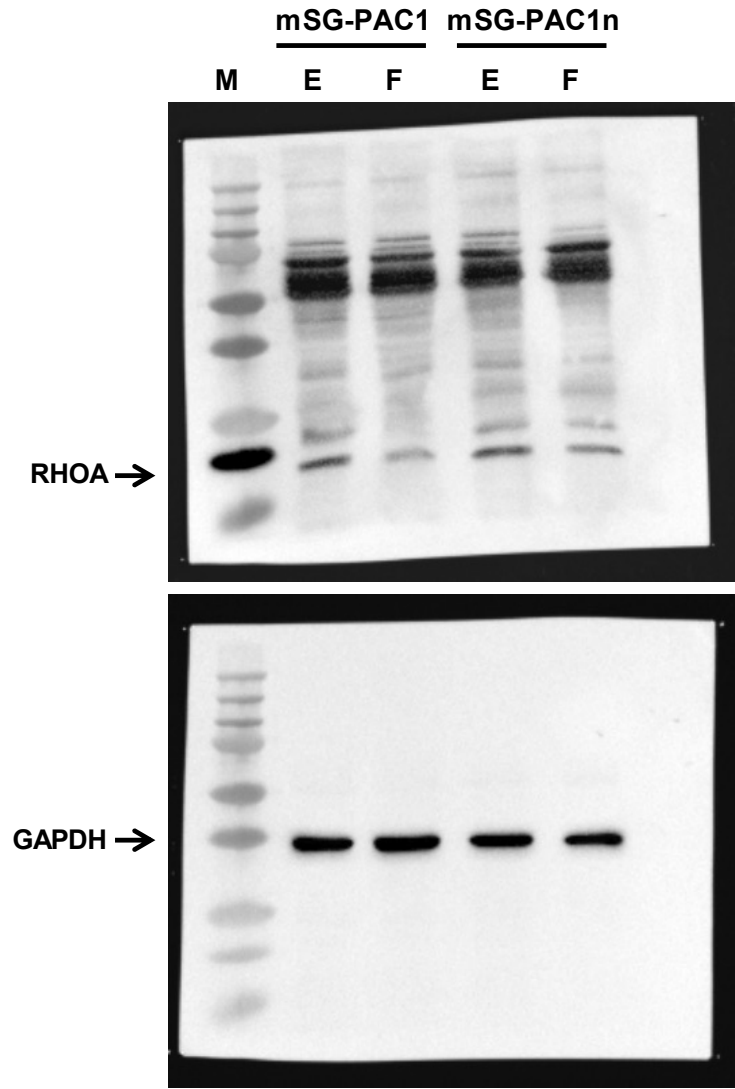

Figure S8. Images of full-length blots for Fig. 6D.
